# Supplementary material
Source: Preprints.org preprint supplement (doi:10.20944/preprints202108.0508.v3)
Supplement: Supplementary file 1 [file detail description of articles reviewed in Beghin-Gustafson Sustainability updated 9 27_CRG.xlsx]

## Sheet: final studies selection analysi
study number	year	attributes	Full reference	topic	organisms/product modified	what is estimated	wtp	attitude acceptance	comparative	trait(s)	method	sample size (kept)	estimated values	GMO	GE gene / genome editing crispr talen	NPETs/NBTs (a a group), rnai, cisgenic	conventional/ hybrids	organic	country	population sampled	Remarks	heterogeneity	Refereed journal article (yes/no)
1	2019	An et al. (2019)	An, Henry, Wiktor L. Adamowicz, and Patrick Lloyd-Smith. "Strategic behavior in stated preferences and the demand for gene-edited canola oil." mimeo (2019).	WTP for GE canola oil wrt to GMO canola oil and addressing hypothetical bias and strategic behavior of respondents	canola oil	WTP for GE canola oil wrt to GMO canola oil	x	na	x	low saturated oil content, country of origin. Canadian canola is either or both insecticide/herbicide resistant	stated preferences with choice experiment. use software NGENE to generate a d-optimal efficient design (zero priors) with 4 blocks and 4 choice sets in each block for canola oil. RUM approach conditional logit	internet sample. 200 pre test 1500 respondents	cad $1.20 to $2.14 more per litre for GE canola oil, a premium of 27-47% over average canola oil prices in Canada The marginal WTP for canola oil with half the saturated fat ranges from $1.04 to $1.50 CAD per liter. the price for a litre of canola oil in Canada can range from $1.50 CAD (no name bulk size) to over $10 CAD (organic) with an average price of approximately $4-5 CAD	x	x	na	na	na	Canada	general adult population	trying to correct for hypothetical bias by random assignment to price, provision effects, no effects.		no
2	2019	Arias-Salazar et al. (2019)	Salazar, Alejandra Arias, Johnny Madrigal Pana, Marta Valdez Melara, and Andrés Gatica Arias. "Attitudes towards genome editing among university students in Costa Rica." Revista de Ciencia y Tecnología 35, no. 2 (2019).	perceptions and knowledge of Costa Rican students on benefits and risk of GE-CRISPR9 wrt application in nature conservation, animal diseases, humans and crop improvements	food, crops, rice, beans	WT consume and buy if better, cheaper, ag products, rice, beans with Y, N, Not sure	na	x		no particular trait, just "better" for natural conservation, human health, or cheaper	multivariate regression on a dependent attitudinal scalle variable	1144 university students from various fields stem and humanities	no explict value but 37.1% would buy rice and beans if the price was equal to conventional, 46.5% willing to buy general ag products if same price as conventional. WTB decreases with age	na	x	na	na	na	Costa Rica	University students sample	how to use these results. Presumably, there is some consumer mass willing to pay a bit more than the price of conventional is that large fraction are willing at the pivotal conventional price	x	yes
3	2021	Basinskiene and Seinauskiene (2021)	Basinskiene L, Seinauskiene B. "Gene Editing Versus Gene Modification: Awareness, Attitudes and Behavioral Intentions of Lithuanian Consumers, Producers, and Farmers." Chemical Engineering Transactions. (2021) 87:433-8.	consumer acceptance of GE and GM technology in plants	generic food	favorable/unfavorable view of GMO and GE in foods	na	x	x	no particular trait, just "better" for natural conservation, human health, or cheaper	online survey and descriptive statistics and tests	251 respondents	GMO and GE seen unfavorably but GMO more so than GE and comparable results for GMO and GE ingredients in food. Consumers have neutral to slightly negative buying intention for both GMO and GE (2.65, and 2.7) (2 likely, 3 unlikely)	x	x	na	na	na	Lithuania	convenience sample of adults online			yes
4	2021	Borrello et al. (2021)	Borrello, M., Cembalo, L. and Vecchio, R., 2021. Role of information in consumers’ preferences for eco-sustainable genetic improvements in plant breeding. Plos one, 16(7), p.e0255130.	WTP for wine made with FRG grapes	wine	WTP for FRG based wine	x	x	x	FRG grapes used for wine, reduced environmental impact and toxicity impact, profit for producers treatment with different messages	survey monkey online with wine drinkers random assignment to information treatments (control, positive, negative) , ordered price choices 1 to 16 euros (multiple price list) plus collection of socio demographics, then SUR linear regression of delta WTP on characteristics and treatments	627 online wine drinkers	premium price for horticultural FRG wines compared to conventional wines (+9.14%) and a strong discount for genome edited FRG wines (–21.13%). The results also reveal that negative information reduces consumers’ WTP for horticultural FRG wines, while positive information increases their WTP for genome edited FRG wines. Heterogenous counsumers with some with higher wtp for FRG wines WTP for gen ed…		x	na	x		Italy	online non representative adults with higher proportion of education and females	Genome editing is called GMO in the message to control group. Heterogeneity on wine subjective knowledge, neophobia of technology and attitude towards sustainability. SUR does not help for some censoring or corner although the delta may help	x	yes
5	2019	Britton and Tonsor (2019)	Britton, Logan L., and Glynn T. Tonsor. "Consumers’ willingness to pay for beef products derived from RNA interference technology." Food Quality and Preference 75 (2019): 187-197	wtp for RNAi beef	beef	WTP for beef that is RNAi	x	na		RNAi and antibiotic free/not free and different meat grades	choice experiment (4 design) then RUM with WTP from as logit estimation Multinomial logit (MNL) and random parameters logit (RPL) models	3000 online surveys	discount for rnai beef of about -3 to -5% (betarnai/beta price)	na	na	RNAi	na	na	usa	online survey	important framing effects with messages and variation with multiple attributes (RNAi, antibiotic, beeef quality). Age, female affects Wtpurchase and eat negatively, education positively	x	yes
6	2020	Britton and Tonsor (2020)	Britton, Logan L., and Glynn T. Tonsor. "US consumers' attitudes toward RNA interference technology in the beef sector." Journal of Agriculture and Food Research 2 (2020): 100049.	us consumers perception and attitudes wrt RNAi in beef products, willingness to eat (WTEat)	beef	WT eat beef that is RNAi	na	x		RNAi for animal health, cattle protection against disease,	generalized ordered logit	2999 online surveys	NA for wtp. 25.2% wt eat, 32.2% wt purchase 25.1% view rnai beef as safe for human health, 22% safe for their family, 63.6% think side effects of eating RNAi meat are unknown 45.%% think family could be exposed to great risk	na	na	RNAi	na	na	usa	online survey		x	yes
7	2021	Busch et al. (2021)	Busch, G., Ryan, E., Von Keyserlingk, M. A., & Weary, D. M. (2021). Citizen views on genome editing: effects of species and purpose. Agriculture and Human Values, 1-14.	consumer perception of genome editing by species (plant, animal, human) across 5 countries	wheat, humans, milk, beef, pork	attitude for or against	na	x		resistance for wheat mildew, HIV human, milk allergy, muscle growth cattle, PRRSV in pig (porcine reproductive and respiratory syndrome)	online surveys in 5 countries (Canada, Austria, USA, Germany, Italy). Scale wrong to right likert scale 1-7. and evaluation of perceived risk and benefits. Factor and cluster analysis	3698	heterogenous attitudes toward the 5 GE applications, with most favorable in USA and Italy. Least favorable application for muscle in beef and milk allergy. HIV highly accepted.	na	x	na	na	na	Canada, Austria, USA, Germany, Italy	online representative surveys	the heterogeneity theme goes well with the Marette et al. papers 1 and 2 which show that a significant segments of consumers accept GE for all kinds of application. Religion matters, sense of right/wrong, risk perceptions, benefit perception, and tampering with nature perceptions	x	yes
8	2020	Caputo et al. (2020)	Caputo, V., J. Lusk, and V. Kilders. "Consumer Acceptance of Gene Edited Foods: A nationwide survey on US consumer beliefs, knowledge, understanding, and willingness to pay for gene-edited foods under different treatments." FMI Foundation report (2020).	survey of us consumers on beliefs, knowledge, understanding and WTP for GE foods pork chop, bacon, tomatos, pasta sauce, spinash fresh, frozen	pork, tomato, spinach	WTPs WTP for these goods and their conditioning by information on benefits, and awarness and knowledge about GE (and GMO)	x	x	x	price, taste, organic, production method, safe, healthy (vitamins, antioxidants, potassium), beneficial to animal welfare (disease resistance) and environment (water saving)	hypothetical discrete choice experiment online questionnaires on attitudes (ethics) etc and WTP between conventional, organic, GMO and GE goods, treatements 3 types of goods (meat, green vegetable, tomatos), 5 production methods (C, O, Gnon-GMO, MO, GE), info on GE, price levels. Cluster analysis with 3 segments of risk perception and impact of treatment, outside option use mixed logit model base…	4487 food shoppers online	mean WTP for organic>conventional>GE>GMO. Need info on tangible benefit of GE more than just the technology. Low awareness and knowledge of GE but high awareness of GMO, benefits to consumers or the environment stronger WTP, not for benefits to farmers. WTP varies by product and processing (fresh has higher wtp for spinach and tomatoes than processed also more than fresh pork. Bacon has higher WT…	x	x	na	x	x	USA	18yo or older US shoppers, representative sampling by Dynata, except gender income and education (typical departures)	also non-GMO label, heterogeneous consumers, some willing to pay for GE goods and information matters. This is the only paper with WTP for GMO higher than GE except for benefit to consumer for tomatos and a spinash for benefit to the environment (WTP doubles), but GE is big unknown. information on technology does not help but information on benefits does increase acceptance and WTP. Benefits to h…	x	no
9	2011	Colson and Huffman (2011)	Colson, Gregory, and Wallace E. Huffman. "Consumers' willingness to pay for genetically modified foods with product-enhancing nutritional attributes." American Journal of Agricultural Economics 93, no. 2 (2011): 358-363.	WTP for vitamin and antioxydant fortified food (all combined) transgenic and intragenic with control of informaton	vegetables	wtp for fortified food with technology and information treatment	x	na	x	labels on goods fortification and production process (no info, GM free, gm, intragenic)	nth price auction mechanism to reveal WTP plus bayesian economtrics to account for censoring of bids, commodity fixed effects, bidding-round fixed effects and unobserved correlation across rounds. Fixed payment to all participants, plus 3 information treatments (pro/anti gmo, verifiable-3d party).	191 participants	in %: All treatments 25 (intragenic fortified-conv without) 5 (transgenic enhanced-plain conventional) No information 31 26 Pro-biotech only 63 19 Anti-biotech only −12 −18 Pro- and anti-biotech 19 3 Pro- and anti-biotech and verifiable 18 −8	x	na	intragenic	x	na	USA	3 urban centers in US, randomly chosen phone call to recruit by independent survey agency	interesting table 2 showing that a large segment (48-50%)prefer intragenic enhanced over plain label, for most information treatment except just anti biotech	x	yes but proceeding issue
10	2011	Colson et al. (2011)	Colson, Gregory J., Wallace E. Huffman, and Matthew C. Rousu. "Improving the nutrient content of food through genetic modification: Evidence from experimental auctions on consumer acceptance." Journal of Agricultural and Resource Economics (2011): 343-364.	WTP for vitamin and anti-oxydant fortified food (tomatoes, broccoli and potatoes) transgenic and intragenic with control of informaton	tomato, broccoli, potato	WTP for these fortified food (anti-oxydant and vitamins)	x	na	x	labels on goods fortification and production process (no info, GM free, gm, intragenic)	nth price auction mechanism to reveal WTP plus bayesian economtrics to account for censoring of bids, commodity fixed effects, bidding-round fixed effects and unobserved correlation across rounds. Fixed payment to all participants, plus 3 information treatments (pro/anti gmo, verifiable-3d party).	190 participants	significant premium for intragenic fortified against plain w/o=1.22 (broccoli), 1.15$ (tomato), 1.16 (potato) with pro biotech message. No info just potato (1.21) significant. Significant transgenic fortifed against conventionalw/o= 0.49 for broccoli with pro biotech message. in intragenic, fortified valued 1.17 (potato), no message, 0.78 (broccoli), 1.02 tomato, 0.95 potato with pro biotech mess…	x	na	intragenic	x	na	USA	2 urban centers in US, randomly chosen phone call to recruit by independent survey agency	formalized experiments and long description in the paper. Some bayesian estimation to capture censoring of zero bids. Crowding with 3 types of messagses reduces wtp for the enhanced food		yes
11	2020	De Marchi et al. (2020a)	De Marchi, E., A. Cavaliere, and A. Banterle (2020). “Consumers’ Choice Behavior for Cisgenic Food: Exploring the Role of Time Preferences.” Applied Economic Perspectives and Policy, doi:10.1002/aepp.13043.	time preference and socio-economics of preference for cisgenic v. conventional apples	apples	treatments:market price,production technology conventional or cisgenic brand, “no brand” or “Melinda” COO, Italy, Germany, and China	x	x	x	cisgenic vesus conventional and interaction with time preferemce and socio demographics	choice experiment face to face interviews questionnaire with Consideration of Future Consequences fourteen-item scale 7Q for immediate and 7 for future-oriented	570 adults	disutility impact of technology is significant (ly negative) for all models (around -1.10 to -1.29) as large as price disutility (cisgenic relative to conventional). Education decreases the disutility by 0.29. low time preference increases disutility; youth too. Income increases discount not sure of units	na	x	na	x	na	Italy	18 yo and older. Nothing is said on sampling	this is the same data as the previous study so not really an independent estimate. The authors make a difference between GE and cisgenesis -we split the two	x	yes
12	2020	De Marchi et al. (2020b)	De Marchi, Elisa, Alessia Cavaliere, and Alessandro Banterle. "Identifying Motivations for Acceptance of Cisgenic Food: Results from a Randomized Controlled Choice Experiment." Journal of Agricultural and Resource Economics Preprints (2020).	the role of health and environmental benefits with cisgenic apples 4 treatments (basic information treatments, naturalness treatment, health, and environment treatments)	apples		x	x	x		hypothetical choice experiment with face to face surveys RUM model with error component	826 adults	discount for technology is from -3.669 (model 1) to -3.328 (1+naturalness, -0.995 (1+health), -.456 (1+environment) message. No buy discount is above health and environment so there is a market. Not sure of the units (euros?)	na	na	cisgenic	x	na	Italy	18 yo and older in Milan random sampling	different sample as the other 2 studies, no analysis of socio demographics, desirability bias potential mentioned with face to face, no check on prior information, price choices limited		yes
13	2019	De Marchi et al. (2019)	De Marchi, E., A. Cavaliere, J. Bacenetti, F. Milani, S. Pigliafreddo, and A. Banterle (2019). “Can consumer food choices contribute to reduce environmental impact? The case of cisgenic apples”. Science of The Total Environment, 681: 155-162.	consumer acceptance of cisgenic apples with environmental benefit (reduced pesticide use)	apples	wt buy relative to conventional	x	na	x	reduced pesticide in cisgenic apples & "attribute non-attendance behaviors (ignorance of some attribute)	hypothetical discrete choice experiment with conventional alternative plus identification of heuristics "attribute non attendnace" face to face interviews variation on brand, production, price and coo plus bayesian design	582	3 heuristics identified with different behaviors. Conventional product is preferred by choice or by ignorance (set to zero 54% of the sample)). Technology driven sub group has a small discount than the "attentive group" -0.464 versus -5.807 (table 2)	na	na	cisgenic	x	na	Italy	random sample	interesting on the attribute non attendance/heuristics used by consumers	x	yes
14	2016	De Steur et al. (2016)	De Steur, H., Blancquaert, D., Strobbe, S., Feng, S., Buysse, J., Stove, C., Lambert, W., Van Der Straeten, D. and Gellynck, X., 2016. Consumer acceptance and willingness-to-pay for genetically modified foods with enhanced vitamin levels. Genetically Modified Organisms in Food: Production, Safety, Regulation and Public Health; Elsevier Academic Press: Amsterdam, Netherlands, pp.195-206.	Consumer acceptance and WTP for transgenic and cisgenic food with enhanced vitamin levels	tomato, broccoli, potato, vegetables	wtp and acceptance of fortified food via biotech	x	x	x	bio-fortified with vitamins	meta analysis/ systematic review. Colson's work is the only intragenic reviewed	19 studies	review premia for bio-fortified food. See review of Colson et al 2011 jare paper for the WTP value	x	na	intragenic	x	na	USA, China, France, NZ,	varies by study	This study does not add to Colson's papers. There is strong evidence reviewed here than enhanced food are accepted by consumers and WTP is positive for GMO bio-fortified food items across many countries		no
15	2015	Delwaide et al. (2015)	Delwaide, Anne-Cécile, Lawton L. Nalley, Bruce L. Dixon, Diana M. Danforth, Rodolfo M. Nayga Jr, Ellen J. Van Loo, and Wim Verbeke. 2015. "Revisiting GMOs: are there differences in European consumers’ acceptance and valuation for cisgenically vs transgenically bred rice?." PloS one 10, no. 5 (2015): e0126060.	EU consumer acceptance of rice GMO, and cisgenic and rice with enviro. Benefits	rice	wtp and acceptance of cisgenic and gmo rice	x	x	x	cisgenic versus gmop, versus coventional with environmental benefits	online survey with multiple price list and censored regression with 15 treatments. Differential of WTPs (pairwise) to estimate discount/premia for some types	3002	negative premium for GMO in 5 countries, discount is smaller for cisgenic except in Spain. Very large wt to avoid GMO. Small proportion of consumers willing to consume cisgenic or GMO, especially in France	x	na	cisgenic	x		EU countries: Belgium, France, The Netherlands, Spain, The UK.	Survey Sampling International (SSI) representative samples	parallels Lusk older meta-analysis work on France with the steeper discount and highest willingness to avoid GMO. French consumers are wtp for environmental benefits	x	yes
16	2018	Edenbrandt (2018)	Edenbrandt, Anna Kristina. 2018. "Demand for pesticide-free, cisgenic food? Exploring differences between consumers of organic and conventional food." British Food Journal (2018).	WTP for cisgenic food that are pesticide free relative to conventional food and consumer segments	rye bread	wtp for bread under price, technology, and packaging treatments	x	na	x	pesticide free or not, cisgenic, transgenic or conventional, price, domestic/imported, loaf/sliced	revealed preference on organic purchase plus choice experiments. 3 segments (green potentially greens, nongreens) with RUM on price and characteristics	781 adult respondents	(comparison or trait), model 1 model 2 3 segments Transgenics over conventional −17.27*** −10.96***−16.47***−28.69*** Cisgenics over conventionalᵇ -7.69*** −4.97 −4.53 −31.74*** Transgenics over cisgenicsᶜ −9.58*** −5.99 −11.93*** 3.05 Pesticide-freed 0.22 −4.13* 3.39 −7.11 Pesticide-free by cisgenic methodsᵉ 5.97** 1.72 3.43 29.21*** Transgenics and pesticide-free over conventionalᶠ −17.05*** -1…	x	na	cisgenic	x	x	Denmark	consumer panelsby GfK ConsumerScan Denmark	segmented consumers based on organic milk because organic rye is small share. Got rid of extensive margin (no purchase). Transgenic strongly disliked more than cisgenic. Heterogeneity formalized by signifcant variance. Price response is small. Looks at labeling or not and market share. no cost of information. pesticide free less valued than organic.	x	yes
17	2018	Edenbrandt et al. (2018a)	Edenbrandt, A. K., C. Gamborg, and B. J. Thorsen (2018). “Consumers’ Preferences for Bread: Transgenic, Cisgenic, Organic or Pesticide-free?”Journal of Agricultural Economics 69(1): 121-141.	WTP for cisgenic food that are pesticide free relative to conventional food and consumer segments	rye bread	wtp for bread under price, technology, and packaging treatments	x	na	x	pesticide free or not, cisgenic, transgenic or conventional, price, domestic/imported, loaf/sliced	revealed preference on rye bred purchase plus choice experiments, both with RUM on price and characteristics	713	RUM results show lower disutulity for cisgenic (-0.84) than transgenic (-1.80) but both larger than do not buy (-0.76). Large std deviation suggests heterogeneity of consumers. Pesticide free transgenic reduces the discount by 0.5 and makes it attractive (better than do not buy)	x	na	cisgenic	x	x	Denmark	consumer panels by GfK ConsumerScan Denmark to match revealed and stated preferences	close to the Edendbrant paper in British Food Journal	x	yes
18	2018	Edenbrandt et al. (2018b)	Edenbrandt, Anna Kristina, Lisa A. House, Zhifeng Gao, Mercy Olmstead, and Dennis Gray. 2018. "Consumer acceptance of cisgenic food and the impact of information and status quo." Food Quality and Preference 69 (2018): 44-52	wtp for cisgenic food (grapes)	grapes	wtp for grapes and with variation in seed attributes and 2 traditional grapes (muscadine, Thompson-table grape) and interaction	x	na	x	production process, seed(less) (small, large, none)	stated preferences choice experiment with 3 prices, 3 production process, 3 seeds, 2 grapes, short, long message, then linear utility (RUM to me) and multinomial and random parameter logit. Base level grape has large seeds and bred conventional	854 muscadine, 900 table grapes	key results WTP is smallest for transgenic, then cisgenic, then conventional but all higher than opt out. WTP base (1.99 and 2.02 for table, 2.52 and 2.61 for muscadine. discounts transgenic=-0.72, -0.51 table, -0.84 and -0.64 muscadine; discount cisgenic= -.23 and -.22 for table, -.84 and -.64 for muscadine), seed-production method interaction not large. seedless is largest booster of WTP	x	na	cisgenic	x	na	USA	online survey, southern US region	typical over-representaton of female in sample and overly white for the south. Potential conclusion that adding an improvement is key (seedless here), see also Marette, and Colson et al. on vegetables. Also issue of status quo || to collapse (loss of an option brought back by GM or npets seens as a positive. collapse is the extreme case of losing all attributes.		yes
19	2010	EFSA (2010)	European Food Safety Authority (EFSA). 2010. SPECIAL EUROBAROMETER 354. Food-related risks, 2010.	large EU survey to gather risk perception of consumers includingh GMO. Will use this wrt the 2019 EFSA publication	food, drink	risk concerns	na	x	x	GMO/genetically modified organisms	simple survey question and ANOVA	26691 interviews	survey of perceived food safety risk on GMO in 2005 and 2010, (then in 2019 GE). In 2005 62% were concerned by GMO and then 66% on 2010 for EU27.	x	na	na	x	na	EU-27	representative sample in 27 members	we use these 2 surveys to conjecture that GE concerns are low relative to GMO and that GMO followed an inverted U shape for its concern which have decrease considerably since 2008.	x	no
20	2019	EFSA (2019)	European Food Safety Authority (EFSA). 2019. SPECIAL EUROBAROMETER Wave EB91.3. Food Safety in the EU. 2019.	similar idea as in 2010 and 2005	food, drink	risk concerns	na	x	x	GMO and GE	simple survey question and ANOVA	27655	28% concerned by GMOs, 4% concerned by Genome editing	x	x	na	x	na	EU-27	representative samples in 28 EU members		x	no
21	2020	Farid et al. (2020)	Farid, Mohamed, Jianfei Cao, Yeongjoo Lim, Teruyo Arato, and Kota Kodama. 2020 "Exploring factors affecting the acceptance of genetically edited food among youth in Japan." International journal of environmental research and public health 17, no. 8 (2020): 2935.	Acceptance of gene edited food and conditioning factors	food, crops	Knowledge, Attitude Towards Technology, Perceived Benefits, Perceived Risks, Trust, and Willingness to Purchase, and role of information on these (2 surveys)	x	x		focus on technology and its risks and benefits (human health, animal health and comfort, effect on the local economy and agriculture, and solving hunger)	double survey plus intervention in between to measure impact of science commuication with structural equation modeling and estimation on adoption rate	180	estimates of impacts of factors capturing KN, ATT, PR, PB, TR eventually on WTP. Perceived benefit has a coefficient of 0.437 on WTP and risk -0.194. ATT affects knowledge and trust eventually to WTP, 24% (survey 1) and 41% (survey 2) of respondents willing to buy GE food.	na	x	na	na	na	Japan	University students online surveys	unsual path model estimation (no equation to see how it is done. Almost looks like partial correlations between factors and attitide ratings and WTP. Communication matters here (in between the 2 surveys)	x	yes
22	2020	Ferrari et al. (2020)	Ferrari, Linda, Chad M. Baum, Alessandro Banterle, and Hans De Steur. (2020). "Attitude and labelling preferences towards gene-edited food: a consumer study amongst millennials and Generation Z." British Food Journal (2020).	consumer attitudes for GE food and labelling and influences of educational background, bjective/subjective knowledge, environmental concern and socio-demographics	food	attitude for or against GE and labeling preference	na	x	x	GE generic then environmental concerns, objective knowledge on GE.	2 online survey samples of millenials and Gen Z in Belgium and NL, then OLS and ordered logit models; differentiates objective and subjective knowledge, risk perception, factor analysis to reduce the dimensionality of many questions per category (risk, knowledge, sociodemographics)	234	findings more than estimates: knowledge on GE and GMO was good (4.9/6), ok, on GMO policy Belgians more knowledgeable than Dutch, attitudes on risk and pro/against GE and GMO are near the middle in likert scale. GE and GMO should be labelled but limited support for same label. Positive towards GE explained by objective knowledge and negatively by env. concerns. attitude to GE explains GE labels (…	x	x	na	na	na	Belgium, Netherlands	Generation Z and millenials	a lot of comparison to GMO in the text and guiding the specification of conditioning factor (risk, knowledge).	x	yes
23	2011	Gaskell et al. (2011)	Gaskell, George, Agnes Allansdottir, Nick Allum, Paula Castro, Yilmaz Esmer, Claude Fischler, Jonathan Jackson et al. "The 2010 Eurobarometer on the life sciences." Nature biotechnology 29, no. 2 (2011): 113-114.	see eurobarometer 2010	food	consumer concerns about biotech	na	x	x		none just descriptive	efsa eurobarometer data 13,529	Eurobarometer points to some of the general criteria—sustainability, benefits, appropriate regulation, safety and a fair distribution of benefits and risks. This is complementary to the article by Kronberger et al. on eurobarometer on cisgenesis being more acceptable than GMO	x	na	cisgenic	x	na	EU-27			x	yes
24	2019	Gatica-Arias, et al. (2019)	Gatica-Arias, Andrés, Marta Valdez-Melara, Griselda Arrieta-Espinoza, Federico J. Albertazzi-Castro, and Johnny Madrigal-Pana. "Consumer attitudes toward food crops developed by CRISPR/Cas9 in Costa Rica." Plant Cell, Tissue and Organ Culture (PCTOC) 139, no. 2 (2019): 417-427.	perceptions and knowledge of Costa Ricans on benefits and risk of GE-CRISPR9 wrt application in nature conservation, animal diseases, humans and crop improvements	food, crops, rice, beans	Wt consume and buy if better, cheaper, ag products, rice, beans with Y,N, Not sure and attitude scale	na	x		no particular trait, just "better" for natural conservation, human health, or cheaper	multivariate regression on a dependent attitudinal scale variable	1018 adult Costa-Rican phone interviews	no explicit value but 50% would buy rice and beans if the price was equal to conventional	na	x	na	na	na	Costa Rica	general population phone sample		x	yes
25	2021	Kato-Nitta et al. (2021)	Kato-Nitta, Naoko, Yusuke Inagaki, Tadahiko Maeda, and Masashi Tachikawa. 2021. "Effects of information on consumer attitudes towards gene-edited foods: a comparison between livestock and vegetables." CABI Agriculture and Bioscience 2, no.1 (2021): 1-12.	attitudes and information provision on GE livestock (pig) and vegetables (tomatoes) in Japan using a web survey. Major concern is the concern to change appearance of animals	tomato, pork	acceptability of these two products and how information influences the acceptability/ attitudes	na	x		increasing size; more resistant to disease; better nutritional value and taste	multivariate analysis on data collected in online surveys with hypotheses plants and animals are different, scientific knowledge influences preferences	4514 (2288 animal and 2226 tomatoes	GE vegetable more acceptable/beneficial than GE pig/meat for most attributes. Science literacy influences the acceptability of GE vegetable positively for all attributes and animal for disease resistance	x	x	na	x	na	Japan	Japanese adults 20-69 yo, done by a survey company, follows 2015 census regional weights, pretty representative	The conventional and GMO comparison was only used in the informaton provision, not in the value elicitation. same authors have a 2d paper on another commodity	x	yes
26	2019	Kato-Nitta et al. (2019)	Kato-Nitta, Naoko, Tadahiko Maeda, Yusuke Inagaki, and Masashi Tachikawa. 2019. "Expert and public perceptions of gene-edited crops: attitude changes in relation to scientific knowledge." Palgrave Communications 5, no. 1 (2019): 1-14.	expert and public attitudes toward gene editing to agricultural crops compared GMO and conventional breeding in 3 groups molecular biology experts, experts in other fields, and lay public. Also use and test of information deficit model (for lay consumers)	crops	acceptability of GE relative to GMO and conventional looking at risk, benefit and value perceptions of consumers split into 3 groups	na	x	x	risk, benefit, and value perceptions	2 online surveys and multivariate analysis with expert, lay public and before and after information provided on biotech	3197	Mol bio experts with higher benefit and value perceptions, and lower risk perceptions of biotechnologies but GMO ranked slightly better than GE for several benefits; lay public views GE better than GMO, but much lower than conventional. Experts of other fields, in between. Science literacy increased benefit perception in lay people. women discount benefits of biotech. science literacy increase be…	x	x	na	x	na	Japan	adult population sampled by a survey company. Quasi representative sample for large sample (3000), then not representative for experts (2 groups 111 molecular bio, 86 other fields)	Graphs are most telling. low adjusted R^2 typical for difference scores, results on science literacy more muddled than explained (sign reversals, not all significant)	x	yes
27	2021	Kato-Nitta et al. (2021)	Kato-Nitta, Naoko, Masashi Tachikawa, Yusuke Inagaki, and Tadahiko Maeda. 2021. "Public perceptions of risks and benefits of gene-edited food crops: An international comparative study between the US, Japan, and Germany." Manuscript submitted for publication. Joint Support-Center for Data Science Research and the Institute of Statistical Mathematics, Research Organization of Information and System…	public perceptions of benefits and risks of gene editing for food crops in Germany, Japan, and US	livestock, vegetables	perceptions of benefits and risks of GE vs. conventionally bred livestock/vegetables	na	x	x	risk and benefit perceptions	online surveys of public in Germany, Japan, and US after provision of information about conventional breeding and GE for livestock (hogs) and vegetables (tomatoes)	5854 = 1962 (Germany); 1842 (Japan); 2050 (US)	GE: US respondents perceived lower risks of GE for both vegetables and livestock than German/Japanese respondents (non-sign. differences between JP & DE); significant differences for both Country and Group in 2-factor ANOVA. US respondents perceived higher benefits of GE than JP, which perceived higher benefits than DE for both plants and animals (sign. difference in country; no sign. difference …		x	na	x		Germany, Japan, US	General public of each country 20-69 yo; proportionate sample allocations by age, gender, and region according to 2019 US Census; 2019 JP residential register; 2011 Eurostat Census Data	Graphs illustrate main results. No examination of influence of individual characteristics/heterogeneity on perceptions.		no
28	2021	Kilders and Caputo (2021)	Kilders, Valerie, and Vincenzina Caputo. 2021. "Is Animal Welfare Promoting Hornless Cattle? Assessing Consumers' Valuation for Milk from Gene‐edited Cows under Different Information Regimes." Journal of Agricultural Economics (2021).	milk value (WTP) from GE cows under various treatment/regimes	milk	WTP for milk of ge hornless cows. (animal welfare)	x	na	x	milk from ge dehorned cows, not dehorned cows, traditionally dehorned	1000 surveys to estimate wtp under different information regimes (animal welfare) using parametric and semi parametric hypothetical discrete choice models. control and 4 treatments of information (none, to GE better than GMO and animal welfare)	1043	Information is polarizing (hollowing the middle). The discount for Genome editing falls as more info is provided from -2.67 to -1.38 and discount for traditional dehorning increases from -1.17 to -3.22. Standard deviations become larger and more significant as more info is provided. 34% with positive wtp for gene-gmo-aw. nonparametric show bimodal distributions in wtp for the milk	na	x	na	x	na	USA	not much on the sampling	also considers cows with horns (3 options, ge dehorned, conventional dehorned, not dehorned)	x	yes
29	2014	Kronberger et al. (2014)	Kronberger, Nicole, Wolfgang Wagner, and Motohiko Nagata. (2014). "How natural is “more natural”? The role of method, type of transfer, and familiarity for public perceptions of cisgenic and transgenic modification." Science Communication 36, no. 1 (2014): 106-130.	perceptions of cisgenic v transgenic and desire to see a lable or not on cisgenic	animals, human, plants, apples	perception for 3 types of hybrids, gene transfer (sex or ge), mention of hybrid existence, study 3 on apple cisgenic/transgenic ieurobarometer question	na	x	x	naturalaness of ge hybrids, negative imaginary, moral acceptability, usefulness, risk, familiarity, disease resistane apple trees and redued pesticides use	simple surveys of students and then ANOVA just frequencies from eurobarometer data, mostly simple correlations and means and frequencies.	study 1 188 students; study 2 83 non students asutrian, 123 japanese non students, efsa barometer data 13,529	unfamiliar hybrid is seen more negatively; concern for ge driven hybrid, cross-breeding even less acceptable than cisgenic/sexual breeding; eurobarometer cicgenic apples are more acceptable than transgenic but still consumere would like a GMO label for both transgenic and cisgenic. In all EU countries, our example of the cisgenic production of apples receives higher support (55%) than transgenic …	x		cisgenic	x		Austria, Japan, EU 27	students and non students in Austria and Japan, EU 27 countries	a bit soft on perception and psychology. And extreme case of cross breeding human-animal	x	yes
30	2006	Lusk and Rozan (2006)	Lusk, J. L., & Rozan, A. (2006). Consumer acceptance of ingenic foods. Biotechnology Journal: Healthcare Nutrition Technology, 1(12), 1433-1434.	Consumer acceptance of ingenic foods.	vegetables	wt eat vegetable	na	x	x	extrae gene(s) ingenic or transgenic	survey and yes no and frequencies and chis quare test	501 in USA, 200 in France	77.3% of US respondents would eat a vegetable with extra gene ingenic, 37.5% in France, extra gene from a different vegetable, 61.7% in US, 21 in France, extra gene from a bacterium, 25.3% in US, 7% in France!	x	na	ingenic	na		France USA	mail surveys random samplingfrom sampling companies	second paper on wt eat and acceptability of cisgenic (path breaking paper)	x	yes
31	2018	Lusk et al. (2018)	Lusk, Jayson L., Brandon R. McFadden, and Norbert Wilson. "Do consumers care how a genetically engineered food was created or who created it?." Food Policy 78 (2018): 81-90.	heterogeneity in consumer preferences for genetic engineer food	food	consumer preferences wtp, acceptance	x	x	x	what food, technologies , how to regulate, or the type of innovators	food demand surveys in the US, monthly surveys, frequencies on questions agree/disagree type		consumers make a diff between GMO and cisgenic, for regulation, but also that all techniques should be regulated on health and environment outcome not on technology. If innovator is non profit or small better acceptance than monsanto. Consumers know that they do not know enough about these technologies. consumers do not discriminate well on regulation and risk levels. support same regulation for …	x	x	cisgenic	x	na	USA	representative sample us consumers monthly	has useful references on the parallel between GMO or gen enginereed food more acceptable with health or environment benefits see section 3	x	yes
32	2021	Marette et al. (2021a)	Marette, Stephan, John Beghin, Anne-Célia Disdier, and Eliza Mojduszka.2021 "Can foods produced with new plant engineering techniques succeed in the marketplace? A case study of apples." (2021): 36-p.	WTP for GE apple and demand for apple	apples	emergence on market and demand	x	na	x	reduced bruising/browning	surveys (see Marette et al. 2021)		use the WTP >0 to derive a consumer demand	x	x	na	x	na	France, USA		this is the same WTP study as Marette Disdier Beghin but it is utiized to consruct a consumer demand using the non protext and positive segments of the WTP distribution	x	no
33	2021	Marette et al. (2021b)	Marette, S.; Disdier, A.-C.; Beghin, J.C. A comparison of EU and US consumers’ willingness to pay for gene-edited food: evi-357 dence from apples. Appetite 2021, 159, https://doi.org/10.1016/j.appet.2020.105064.	WTP of conventional hybrid, GE, GMO improved apples	apples	WTP for novel apples	x	na	x	reduced bruising and browning, reduced food waste	hypothetical choice experiments tobit estimation	166 US, 162 France	In the USA: GE discounted (0.9718 unitless), conventional (0.9564), hybrid (1.2490), GMO (0.8582), attitude wrt innovation can reverse the discounts in france:GE discounted (0.4615 unitless), conventional (1.0236), hybrid (0.9836), GMO (0.1547), attitude wrt innovation can reverse the discounts	x	x	na	x	na	France, USA	college staff and faculty in US, representative sample in France	science/technology attitude influences wtp, protest /boycott consumers	x	yes
34	2021	McFadden et al. (2021)	McFadden, Brandon R., Brittany N. Anderton, Kelly A. Davidson, and John C. Bernard. "The effect of scientific information and narrative on preferences for possible gene‐edited solutions for citrus greening." Applied Economic Perspectives and Policy (2021). DOI: 10.1002/aepp.13154	WTP for three oranges produced with GE insect or GE tree to prevent citrus greening	oranges	WTP for oranges: either when insects are gene-edited or trees are gene-edited	x	na		prevention of citrus greening	hypothetical choice experiment using random utility model; specific estimation approach not disclosed	1185 (Qualtrics via internet)	No significant difference between insect GE/tree GE in simple model. Interactions between "narrative" information exposure decreased WTP for insect GE (-$0.19/3 oranges), but information relating GE to conventional breeding counteracted the impact; In specification 2, Insect = -0.113(0.050), p<0.01. Insect*I1: 0.243(0.108), p<0.05	na	x	na	na	na	USA	representative US sample by age, income, and sex	Paper is generally about effect of information about similarity of GE, GM, and conventional breeding on perceptions of similarity and perceived safety of techniques	x	yes
35	2013	Mielby et al. (2013)	Mielby, H., Sandøe, P., Lassen, J., 2013. Multiple aspects of unnaturalness: are cisgenic crops perceived as being more natural and more acceptable than transgenic crops? Agric. Hum. Values 30, 471–480.	perception of cisgenic crops for less unnaturalness	crops		na	x	x		5 focus groups of 6 to 8 people interviews with 3 assignments (key words associtade with GM, ranking cards showing GMO plants by decreasing order of like/dislike,	small 5X 6 or 8	it is diffifcult to define naturalness and human interference trans and cisgenic seems to bother people , foreign versus own genes, and features (danger to introduce a new feature)	x	na	cisgenic	na	na	Denmark	not at all representative, same education level	could maybe use this article to explain that humans have a complex heterogenous perception of unnaturalness using several criteria and that the foreign/own gene dichotomy is only one possible among 5	x	yes
36	2020	Müller et al. (2020)	Müller M, Schneider M, Salathé M, Vayena E. 2020. Assessing public opinion on CRISPR -Cas9: combining crowdsourcing and deep learning. Journal of Medical Internet Research. 22, no. 8: e17830	semtiment and perception of CRISPR	plants, animal, bacteria, humans	semtiment/attitudes towards CRISPR in a wide set of applications using twitter data	na	x	na	technology of CRISPR	using twitter data and machine learning and Amazon Turk to filter through thousands of tweets from 2013 to 2019 (May)	1,508,044 tweets by 348,502 distinct users	sentiment of tweets about crispr and genome editing. Which is widely positive for plants and animals, les so for humans. This varies during peaks following events during which more negative temporarily emerge	na	x	na	na	na	Switzerland	tweeting adults in Switzerland	novel approach and heavy on machine learning. Quite remarkable result that sentiment is mostly positive for CRISPR applications on plants and animals	na	no
37	2020	Muringai et al. (2020)	Muringai, Violet, Xiaoli Fan, and Ellen Goddard. "Canadian consumer acceptance of gene‐edited versus genetically modified potatoes: A choice experiment approach." Canadian Journal of Agricultural Economics/Revue canadienne d'agroeconomie 68, no. 1 (2020): 47-63.	WTP for GM vs. gene-edited potatoes	potato	WTP for GM vs. GE	x	x	x	Health (reduction in acrylamide levels); environmental (reduction in food waste (bruising/browning), less pesticide application).	SAS used to generate fractional factorial design: 48 choice sets blocked into six versions. stated (i.e., hypothetical) choice experiment; random parameters logit and condition logit models	3014 (online survey). "Generally representative" of natl. pop. in terms of HH size, gender, location.	Separate traits from breeding technology. WTP in CAD/KG; base breeding TK is conventional breeding. Acrylamide reduction: 1.07 (0.08); Waste reduction: 0.27 (0.07); pesticide reduction: 1.07 (0.08); GM transgenic: -2.31 (0.09); GM cis/intragenic: -2.18 (0.09); Gene editing: -1.97 (0.08); all reported values are significant at p<0.01	x	x	na	x	na	Canada	"generally representative" of Canadian population by gender, HH size, geographic location; respondents were more educated (more had university/graduate degrees), higher income, were older, and more households had children than national averages.	Results reported in this sheet are mean WTP calculated for each individual respondent. Authors also interact individual characteristics with attributes to examine heterogeneity in preferences by characteristics. See paper for these results.	x	yes
38	2019	Narh et al. (2019)	Narh, A., L.L. Nalley, B. Dixon, H. Snell, & R.M. Nayga Jr. A multi-country study of the willingness-to-consume alternative (RNAi and CRISPR) genetically modified food. Poster at 2019 AAEA meetings	Willingness to consume rice using multiple price format for GM, CRISPR, & RNAi	rice	Willingness to consume GM, CRISPR/RNAi	na	x	x	Glyphosate resistance (GM/CRISPR), topical application of RNAi Bt	Multiple price format willingness to consume	CRISPR (2315); RNAi (1677)	% Willing to consume; marginal effects of responses to New Ecological Paradigm (NEP) survey	x	x	RNAi	na		Australia, Belgium, Canada, France, USA	No information	Willingness to consume; examines GM, CRISPR, & RNAi. Only a poster, so very little detail on research design elements	x	no
39	2021	Nkott and Temple (2021)	Nkott, Anny Lucrèce Nlend, and Ludovic Temple. "Societal acceptability conditions of genome editing for upland rice in Madagascar." Technological Forecasting and Social Change 167 (2021): 120720.	Acceptability of CRISPR-CaS9 to produce rainfed rice for use in Madagascar	rice	Conditions that would make use of CRISPR to modify rice acceptable.	na	x		Improved nitrogen use efficiency	38 semi-structured interviews with seed system organizations; multistakeholder forum; rice producer survey (n = 148).	38 interviews; 148 producer surveys	INTERVIEWS: concerns about 1) producers' economic/physical access to seeds (61%), 2) biosafety regulation (39%); 2) strengthening innovation dissemination system (39%). SURVEYS: low membership in producer organizations (2% of respondents), which are an important way to access information. No access to credit (76%) is another problem, given that seeds are costly (most producers save/exchange seeds…	na	x	na	na	na	Madagascar	Various stakeholders in the rice industry; rice producers		x	yes
40	2020	Norwegian Biotechnology Advisory Board (NBAB). 2020	Norwegian Biotechnology Advisory Board (NBAB). 2020. Norwegian consumers’ attitudes toward gene editing in Norwegian agriculture and aquaculture.	Norwegian consumers attitudes toward ge in plants, livestock and fish with 10 different traits	fruits, vegetables, wheat, crops, beef, pork, salmon, potato	attitudes and WTP for GE goods	x	x	x	reduced pesticide, crop loss, climate adaptation, higher yield, improving animal and fish health, reduced envir impact of aquaculture	focus groups and qualitative and quantitative surveys and ANOVA	20 in focus groups, 2,000 online panel	attitudes in favor for animal welfare, health, environment improvements, against appearance changing for ag, aimals or increasing production traits in animal or affect their welfare negatively. most consumers have risk concerns on negative effects on health and environment. trust for local research (home bias), distrust for "global" market and producers. Trust in norwegian governance-approval pro…	x	x	na	na	x	Norway	2016 respondents, nationally representative of age, gender and geographical region from online IPSOS panel but education higher than country average	big lag between surveys and publications (4 years), so it could influence results by limited familarity with ge in 2016. no WTP estimate just a question: willing to pay extra for improved ge	x	no
41	2021	Ortega et al. (2021)	Ortega, David L., Wen Lin, and Patrick S. Ward. "Consumer Acceptance of Gene-Edited Food Products in China." Food Quality and Preference (2021): 104374.	consumer acceptance and valuation of GE versus conventional and GMO for rice and pork avoiding cadmium contaminaton (rice) and african swine fever and role of fear (neophobia) and information	rice, pork	WTP, acceptance, attitude for GE rice and pork	x	x	x	reduced cadmium accumulation and contamination in rice, and resistance to african swine fever pork, traceable or not	choice experiment online with 12 pairs of 3 technologies (GE,GMO, conv), traceability or not, and 4 price levels. Not buying is a choice. And rum with mixed logit with radom assignment information treatments (none, infor on GE and GMO) plus questionnaire to gauge technology neophobia.	835 online survey 18yo or older	45% find GE plants and 38% GE animals should be allowed, 36% for GMO plants, 30% transgenic animals. Food neophobia increases with age, decrease with education and income, except top tier. Wtp rice -35.84 rmb/5kg and -42.94(info), GE -12.89 and -16.4(info) and transgenic pork -37.21 rmb/jin and -14.80 info and GE pork -18.26 and -4.45 (info) traceable +13.99 and +6.17 (info) WTP=-MU(attribute)/MU…	x	x	na	x	na	China	835 chinese adults geographically dispersed run by Survey Sampling International	has a supplemental folder with more estimation results. Consumers have lower subjective knowledge of GE than GMO another stylized fact (caputo et al paper). Also information has opposite effects on WTP for rice and pork. Hard to understand but quite strong.	x	yes
42	2021	Paudel (2021)	Paudel, B. (2021). US Consumers' Acceptance and Willingness to Pay for Genetically Modified and Genome-edited Foods. Unpublished master thesis SD State University.	acceptance and WTP for GE apples and vegetable oil versus Gmo	apples, soy oil	WTP and attitudes towards GMO and GE food and impact of information treatment	x	x	x	health benefits oil (high oleic acid or not), environmental benefits (reduced pesticide or not) and the sector undertaking R&D (and technology) (university, domestic startup, multinational, no info) apple (high vitain C, antioxidants, resisting browning)	econometric estimation of WTP using discrete choice experiment with RUM with optout with 3 information treatments (gm, ge, no info, conventional and control) and where the R&D is done. Reduced choice set to 24 combinations using Ngene app in 4 blocks. Cheap talk to avoid hypothetical bias. use random parameter logit	1573	soy oil Conventional breeding $1.10*** [0.30, 1.88] $1.73*** [0.86, 2.60] $2.31*** [1.22, 3.46] Genetically modified (GM) $0.05 [-0.82, 1.01] $-0.07 [-0.96, 0.93] $1.03 [-0.28, 2.71] Genome-editing $0.13 [-0.69, 1.04] $0.71 [-1.19, 1.75] $2.02*** [0.72, 3.82] apple wtp Conventional $1.18*** [0.83, 1.58] $1.13*** [0.78, 1.51] $1.21*** [0.79, 1.67] Genetically modified (GM) $-0.52*** [-0.88, -0.14]…	x	x	na	x	na	USA	1573 adults nationally representative sample by Qualtrics (the company) using quotas	clusters of consumers are identified to capture heterogeneity. They cite McFadden et al. 2021 and Shew et al. 2018 as 2 studies finding similar discounts for GMO and GE foods. Has interesting background on commercialization of GE crops pages 8-9 . Also find that domestic startup>university>multinational for soyoil for apple similar ranking except for treatment 2 university>domestic startup>multin…	x	no
43	2021	Pruitt et al. (2021)	Pruitt, J.R., K.M. Melton, & M.A. Palma. 2021. Does Physical Activity Influence Consumer Acceptance of Gene-edited Food? Sustainability. 13(14) 7759.	Willingness to pay for GE vs GMO potatoes	potato	WTP for GM vs. GE	x	na	x	Health (reduced acrylamide levels); Cosmetic (reduced bruising)	"Choice experiment" for a potato and gift certificate of varying value	282	$0.529 (se=0.153, p<0.01; no demographics) premium for GE over GMO; $0.472 (se=0.243), p<0.1; w/ demographics) premium for GE over GMO	x	x	na	na	na	USA	College students, grad students, faculty staff (though mean age = 22 years, so likely really only students)			yes
44	2017	Rousselière and Rousselière (2017)	Rousselière, D., & Rousselière, S. (2017). Is biotechnology (more) acceptable when it enables a reduction in phytosanitary treatments? A European comparison of the acceptability of transgenesis and cisgenesis. PloS one, 12(9), e0183213.	Estimation of a Bayesian multilevel structural equation model on acceptability using data from the Eurobarometer 2010 73.1 on science.	apples	Attitudes and heterogeneity of attitudes at individual and national levels in EU/EU-adjacent countries using data from Eurobarometer 2010	na	x	x	Resistance to apple scab and mildew	Bayesian multilevel structural equation model	15,650 (reported in table 1 as "Sample"--somewhat unclear because in the same table they list Luxemburg, Netherlands, Turkey, and Hugary separately)	Acceptability of cis- vs. trans-genic TK; environmental attitudes; interest in science/biotk, relationship between individual and national heterogeneity of attitudes; Cis (44.0%) vs. Trans (27.5%) said "should be encouraged." Some difference in questions for cis- vs. trans-genic TK; 42.4% thought Transgenic is "promising"; 60.5% though Cisgenic "will be useful." See notes for additional findings …	x	na	cisgenic	na	na	EU-27, Norway, Iceland, Turkey	EU-27 countries plus Norway, Iceland, Turkey	See notes. Language in scenarios posed to participants = "a series of questions was asked with an initial scenario given that each individual was supposed to answer: Some European researchers think there are new ways of controlling common diseases in apples—things like scab and mildew. There are two new ways of doing this. Both mean that the apples could be grown with limited use of pesticides, a…	x	yes
45	2021	Saleh et al. (2021)	Saleh R, Bearth A, Siegrist M. How chemophobia affects public acceptance of pesticide use and biotechnology in agriculture. Food Quality and Preference. 2021 Jul 1;91:104197.	acceptance of cisgenesis for crop protection and consumer chemophobia. Consumers are heterogenous in perception of naturalness and acceptance of technology	potato	acceptance of gene transfer as protection measure and its interface with chemopobia (pesticide)	na	x	x	biotech cisgenesis, GE) as crop protection against blight and as alternative to pesticides, naturalness	online survey with information treatment 4 groups (conventional protection, organic protection with bilogicals, cisgenesis based resistance, GE based resistance) analysis with SPSS and anova and then regression of acceptance against naturalness and chemophobia	643	acceptance order: gene transfer>organic natural pesticide> gene editng> conventional pesticide. Post info loss of naturalness Gene transfer>Gene editing>organic>conventional	na	x	cisgenic	x	x	Switzerland	representative sample by quota. Many observations dropped because of potential conflict of interest linked to chemical companies' affiliations or connections	this is a study of the acceptance of crop protection and biotech is a way of doing so. Cisgenic is more accptede that GE but both preferred to conventional pesticides. Organic is in between (2d highest accepted, 3d in loss of naturalness)	x	yes
46	2004	Schaart (2004)	Schaart, J.G. (2004). Towards consumer-friendly cisgenic strawberries which are less susceptible to Botrytis cinerea. Ph.D. Thesis. Wageningen University	PhD Thesis with a section reporting the results of a survey of residents of Norway, Denmark, and UK about GM strawberries	strawberries	Attitudes towards GM; willingness to buy GM strawberries with different traits; acceptability of trans- vs. cis-genic modification.	x	x	x	Traits examined (note: no comparison between trans and cisgenic TK): longer-lasting, bigger & redder, 20% cheaper, better tasting, lower pesticide use, organic principles, healthier	Summary statistics of survey responses	720	Attitudes towards GM: "will lead to improvements" = ~30%; "make things worse" = ~40%. Traits (would buy) = longer-lasting (~37%), bigger & redder (~39%), 20% cheaper (~50%), better tasting (~52%), lower pesticide use (~58%), organic principles (~62%), healthier (~66%). Cisgenic more acceptable than trans: Completely agree = ~40%; partly agree = ~37%.	x	na	cisgenic	na	na	Norway, Denmark, UK	"Consumers" in Norway, Denmarket, UK	Most of the thesis is about the technological development of the cisgenic strawberry. In chapter 7, <3 pages are devoted to discussing the consumer survey.	x	no
47	2011	Schenk et al. (2011)	Schenk, Martijn F., Marinus P. van der Maas, Marinus JM Smulders, Luud JWJ Gilissen, Arnout RH Fischer, Ivo A. van der Lans, Evert Jacobsen, and Lynn J. Frewer. "Consumer attitudes towards hypoallergenic apples that alleviate mild apple allergy." Food Quality and Preference 22, no. 1 (2011): 83-91.	Perception of the benefits of a novel hypoallergenic apple, comparing traditional breeding with transgenic and cisgenic GM	apples	Choice experiment (without price); attitudes towards GM/conventional apples	na	x	x	Reduced allergenicity	Repeated measures mixed linear models	397	Traditional breeding>cisgenic>transgenic (>=preferred); consumers preferred apples that required less pesticides and that were less allergenic to people with apple allergies. Preference for attributes varied with individual characteristics (e.g., people with apple allergy strongly differentiated between apples with different levels of hypoallergenicity, whereas people not allergic did not). Resul…	x	na	cisgenic	x	na	Netherlands	Shoppers in a supermarket		x	yes
48	2016	Shew et al. (2016)	Shew, Aaron M., Lawton L. Nalley, Diana M. Danforth, Bruce L. Dixon, Rodolfo M. Nayga Jr, Anne-Cecile Delwaide, and Barbara Valent. 2016. “Are All GMOs the Same? Consumer Acceptance of Cisgenic Rice in India.” Plant Biotechnology Journal 14 (1): 4–7.	Acceptance and WTP for cisgenic vs. transgenic (vs. conventional) rice	rice	WTP for cis/transgenic rice (vs. convention) with/without infromation about elimination of fungicides.	x	x	x	Cisgenic vs. GM vs. no fungicide (presented in sequentially in a three-round process)…puzzling	Multiple price list hypothetical WTP elicitation; Interval regression (WTP) and bivariate probit (WTC)	300 consumers in Jaipur	Participants' WTP was significantly higher (than 0) for the "no fungicide" attribute and did not decrease (statistically) when the GM or cisgenic attribute was also present. WTP was less for GM/cisgenic varieties when there was no benefit provided. All reported values are significant at p<0.05	x	na	cisgenic	x	na	India	Convenience samples recruited from different locations in Jaipur.	Authors did not present cisgenic and transgenic GM as differing only in whether introduced genes originated within the same species or not; they described cisgenic as "bred using a process in which genes are transferred between crossable organisms (same species or closely related species). The same result could be obtained by cross-breeding that occurs in nature or by traditional breeding methods…		yes
49	2017	Shew et al. (2017)	Shew, Aaron M., Diana M. Danforth, Lawton L. Nalley, Rodolfo M. Nayga, Francis Tsiboe, and Bruce L. Dixon. 2017. “New Innovations in Agricultural Biotech: Consumer Acceptance of Topical RNAi in Rice Production.” Food Control 81 (November): 189–95.	Willingness to consume and willingness to pay for RNAi vs. GM rice in USA, Canada, Belgium, France, and Australia	rice	Willingness to consume and WTP for RNAi vs. GM rice (vs. conventional)	x	x	x	Bt in GM rice; RNAi for insect control.	Multiple price list hypothetical WTP elicitation; Interval regression (WTP) and bivariate probit (WTC)	2077; in US (439), Canada (399), Australia (400), France (439), & Belgium (400)	WTP for Bt lower then conventional by $12.56 (US), $8.97 (Canada), $7.95 (Australia), $13.35 (France), and $8.66 (Belgium); WTP for RNAi lower then conventional by $7.62, $4.38, $4.24, and $4.92 for US, Canada, Australia, and France. Belgium not significantly lower. Older respondents required less of a discount than younger respondents. All reported values in column I are significant at p<0.05.	x	na	RNAi	x	na	Australia, Belgium, Canada, France, USA	Recruited by SSI; indicated targeting gender, age, education, and income to be representative of study countries	Not sure which category RNAi should be in, re: GE vs. NPETs/NBTs	x	yes
50	2018	Shew et al. (2018)	Shew, Aaron M., L. Lanier Nalley, Heather A. Snell, Rodolfo M. Nayga, and Bruce L. Dixon. 2018. “CRISPR versus GMOs: Public Acceptance and Valuation.” Global Food Security 19 (December): 71–80.	Willingness to consume and willingness to pay for CRISPR vs. GM rice in USA, Canada, Belgium, France, and Australia	rice	Willingness to consume and WTP for CRISPR vs. GM rice (vs. conventional)	x	x	x	Glyphosate resistance	Multiple price list hypothetical WTP elicitation; Interval regression (WTP) and bivariate probit (WTC)	2315 in US (451), Canada (463), Belgium (458), France (499), & Australia (444)	WTC CRISPR (WTCCR)>WTC GM by ~2-17 % pts. (Tbl1); WTCCR range = [40.3, 71.4]; belief that CRISPR & GM helps, is safe & familiarity with GM increases WTCCR; consumers required a discount of $4.58, $1.17, $1.59,$2.12, and $2.24 per pound for CRISPR rice compared to conventionally bred rice in the USA, Canada, Belgium, France, and Australia, respectively, compared to a discount of $4.80, $0.92, $1.6…	x	x	na	x	na	Australia, Belgium, Canada, France, USA	Recruited by SSI; no details provided about targeted participant characteristics.	Conducted a short vs. long information treatment (p. 73 of paper);	x	yes
51	2021	Son and Lim (2021)	Son, Eunae, and Song Soo Lim. 2021. “Consumer Acceptance of Gene-Edited versus Genetically Modified Foods in Korea.” International Journal of Environmental Research and Public Health 18 (7). https://doi.org/10.3390/ijerph18073805.	WTP for GM vs. gene-edited soybean oil	soybean oil, cotton	WTP for GM vs. GE vs. conventional	x	na	x	None specified (beyond GM vs. GE vs. conventional).	Choice experiment (hypothetical); estimation by multinomial logit by MLE	Stratified (by gender, age) sample of 200 consumers in South Korea	MWTP for GM and GE significantly less than conventional (presented in Korean Won) products for both soybean oil and cotton t-shirts. GM<GE for soybean oil, but reversed for t-shirts (though differences between GM/GE were not tested statistically). All MWTP values are signifcant at p<0.001	x	x	na	na	na	South Korea	Stratified sample based on age and gender	No specific trait targeted by GM/GE was mentioned in the document, so respondents likely didn't have a sense of why GM/GE technology was important. The authors also examine MWTP range (max minus min) based on a few individual characteristics, but the results are not particularly informative.		yes
52	2020	Tabei et al. (2020)	Tabei Y, Shimura S, Kwon Y, Itaka S, Fukino N. Analyzing Twitter Conversation on Genome-Edited Foods and Their Labeling in Japan. Frontiers in plant science. 2020;11.	reaction via tweets in japan after policy announcement on GE and labeling policy	food generic	attitudes/concerns	na	x	na	technology GE and it slabelling	analyzing twitter data and peaks following announcement events the method is sentiment analysis	14066 tweeting adults but 530 tweets analyzed	sentiment analysis reveals negative overtones dominate (54.5 to 62.8%) negative vis a vis genome editing and the labeling policy of the Conusmer Affairs Agency, also strong demand for mandatory labelling	na	x	na	na	na	Japan	tweeting population in Japan	novel approach using unusual datset and sentiment analysis, presumably based on word analysis and categorizing some words and strings as negative		yes
53	2017	Tsiboe et al. (2017)	Tsiboe, Francis, Lawton L. Nalley, Bruce L. Dixon, Diana Danforth, Anne-Cécile Delwaide, and Rodolfo M. Nayga. "Ghanaian Consumers’ Attitudes toward Cisgenic Rice: Are all Genetically Modified Rice the Same?." Ghana Journal of Development Studies 14, no. 1 (2017): 1-18.	WTP for GM, cisgenic, or environmentally beneficial rice	rice	WTP trans vs. cisgenic vs. conventional vs. environmentally beneficial	x	na	x	rice blast fungus resistance	Multiple price format willingness to pay for 5kg of rice	253 university students	WTP premium for EB=$13.75 (vs. conventional); WTP discount of $9.75 and $19.94 for cis/transgenic (vs. conventional); respondents w/ more education were WTP more for GM (vs. HS). The text says that more education=higher WTP for GM, but the estimates in the table seem to suggest that it's actually opposite--more education = higher WTP for conventional...perhaps do not discuss this finding given la…	x	na	cisgenic	x	na	Ghana	University students	Not entirely clear what information participants received about use of GM technology--I don't see that they were provided with text indicating that GM was used to provide rice blast fungus resistance. Some additional findings on attitudes towards cisgenic, transgenic, and GM; findings show that GM is viewed more negatively than cis or transgenic. Again, not clear how cisgenic and transgenic are d…		yes
54	2021	Uddin et al. (2021)	Uddin, Azhar, Karina Gallardo, Bradley J. Rickard, Julian M. Alston, and Olena Sambucci. "Are Consumers Willing to Accept Gene Edited Fruit? An Application to Quality Traits for Fresh Table Grapes." (2021).	WTP for attributes of table grapes generated by GE	grapes	WTP for attributes	x	x	x	sweetness, crispness, flavor, skin color, size	online surveys and discrete choice experiment in between subject experiment then mixed logit estimation of rum and latent class model for heterogenous consumers and the source of their preferences treatment on technology, prices and attributes. Qua;trics plus JMP app to do fractional factorial design to reduce the number of exps to 8	2873	wtp for attributes (-beta attributes/beta price) wtp conventional=4.1, GE=3.4 and 3.5, logit shows highst wtp for sweetness, crisp and flavorful and green grapes better than amber/yellow blush. Marginal wtp for sweetness and color is higher for Gethan for conventional hybrids, identified 3 groups of consumers` 3d group finds ge ethical, safe natural	na	x	na	x	na	USA	us population but higher income, more women younger whiter too, representative of population of surveys not the US		x	no
55	2020	Vasquez Arreaga (2020)	Vasquez Arreaga, Oswaldo. CANADIAN CONSUMER PERCEPTION OF GENOME-EDITED FOOD PRODUCTS. MS Thesis. University of Saskatchewan, 2020.	Perceptions and willingness to consume GE and GMO (transgenic) foods	potato, apples, milk, salmon, papaya, sweet corn	WTC GE and GM foods	na	x	x	potatoes: resistance to blackspot bruising & lower levels of asparagine; apples: reduced browning; milk: dehorned cattle	Multinomial logit; probit	497 English-speaking Canadians	Summary statistics on WTC: max of 50% of respondents WTC GE/GM product (GM sweet corn); all others < 50%. (However, only ~80% WTC an organic apple, 78% organic beef, 62% organic bread). Significance not reported	x	x	na	na	x	Canada	English-speaking Canadians	Additional research on individual characteristics reported in the paper. The variables are not named clearly, however. Some expected findings: neophilic consumers more WTC GE/GM; neophobic less WTC GE/GM, etc.	x	no
56	2020	Yang and Hobbs (2020a)	Yang, Yang, and Jill E. Hobbs. "Supporters or opponents: will cultural values shape consumer acceptance of gene editing?." Journal of Food Products Marketing 26.1 (2020): 17-37.	Cultural values and acceptance of GE	food	Factors affecting attitudes towards GE	na	x		NA	Survey analyzed via ordered probit	697	Effect of individual characteristics on attitudes towards GE; positive views of science/TK highly positively related to attitudes towards GE (p<0.01); people who think the risks of biotechnology outweigh benefits have significantly more negative attitudes towards GE (p<0.01); Quebec residents have significantly more negative attitudes (p<0.01); no other variables are significant at normal levels …		x	na	na	na	Canada	Somewhat representative sample of Canadian adults (both French and English speaking)	See paper for marginally significant variables (impact of hierarchical/egalitarian score, gender, presence of children)	x	yes
57	2020	Yang and Hobbs (2020b)	Yang, Yang, and Jill E. Hobbs. "The power of stories: Narratives and information framing effects in science communication." American Journal of Agricultural Economics 102.4 (2020): 1271-1296.	Impact of "narrative" (scientific vs. "informal, personal" communication styles) on wtp for apple slices	apples	WTP for attributes	x	na	x	non-browning; enhanced with anti-oxidants; GE vs GM vs conventional	Hypothetical choice experiment analyzed using multinomial logit and random parameters logit	804	Table 10 in paper presents WTP estimates for attributes in no information vs. 4 information treatments. GE/GM all significantly negative WTP in no info condition; information frequently reduces discount required, but does not eliminate it (still negative WTP even in info conditions). All WTP for GE/GM in no info condition (p<0.01); in info conditions, p<0.05) except for a condition with few obser…	x	x	na	x	na	Canada	Somewhat representative sample of Canadian adults (both French and English speaking)		x	yes
58	2019	Yunes et al. (2019)	Yunes, Maria Cristina, Dayane L. Teixeira, Marina AG von Keyserlingk, and Maria J. Hötzel. "Is gene editing an acceptable alternative to castration in pigs?." PloS one 14, no. 6 (2019): e0218176.	Acceptability of GE to castrate male pigs	pork	Factors affecting acceptability of GE	na	x		Avoiding boar taint	Online survey analyzed with multinomial logistic regression	570	56% of participants considered GE an acceptable method to reduce boar taint; 22% intermediate; 22% opposed. Respondents who grew up in an ag. Environment thought GE was less acceptable than those who did not. Highest reason justifying attitude towards use of GE in pigs: Acceptable: positive effects on animal welfare (63%); intermediate - potential risks GE (61%); not acceptable - dislike/oppose G…	na	x	na	na	na	Brazil	Representative of population of southern Brazil by sex, age, and place of residence; higher education and less religious than population	Also asked a set of questions about acceptability of plant/animal-based biotechnologies used in food production: highest level of acceptability was 43% (for GM vegetables with higher levels of nutrients) down to 25% for meat produced in vitro from pig stem cells). Disparity between high level of support for GE to address boar taint and low levels of support for other genetic technologies is sligh…	x	yes
59	2019	Yunes et al. (2021)	Yunes, Maria Cristina, Zimbábwe Osório-Santos, Marina AG von Keyserlingk, and Maria José Hötzel. "Gene Editing for Improved Animal Welfare and Production Traits in Cattle: Will This Technology Be Embraced or Rejected by the Public?." Sustainability 13, no. 9 (2021): 4966.	Acceptability of GE to 1) increase muscle production; 2) increase heat tolerance; 3) eliminate the need to surgically remove horns	beef	Acceptability/factors affecting acceptability of GE for different purposes	na	x		Increasing meat production, animal welfare/productivity (heat tolerance, hornlessness)	Face-to-face interviews for qualitative analysis; online survey for quantitative analysis	32 in interviews; 864 online surveys	QUALITATIVE themes: benefits/risks of GE; GE and status quo in animal production; "naturalness" of GE and threat to animals' integrity; trustworthiness of information sources about GE. QUANTITATIVE: 73% totally/somewhat opposed to GE for muscle growth; 53% for heat resistance; 49% for horn removal. Dem. variables significantly more accepting = Men; Younger respondents; Educated; Income; ASF consu…	na	x	na	na	na	Brazil	Qualitative: Attendees of university extension event; Quantitative: recruited from Instagram		x	yes
59		summary frequencies					33	43	45					38	37	24	34	12				46	44
															rnai	4
															cisgenic	16
															intragenic	3
															ingenic	1

## Sheet: summary table  for  the paper
Authors and date	organism/product modified	wtp	attitude acceptance	GMO	GE	NPETs other than GE	conventional/ hybrids	organic	country
An et al. (2019)	canola oil	x	na	x	x	na	na	na	Canada
Arias-Salazar et al. (2019)	food, crops, rice, beans	na	x	na	x	na	na	na	Costa Rica
Basinskiene and Seinauskiene (2021)	generic food	na	x	x	x	na	na	na	Lithuania
Borrello et al. (2021)	wine	x	x	0	x	na	x	0	Italy
Britton and Tonsor (2019)	beef	x	na	na	na	RNAi	na	na	usa
Britton and Tonsor (2020)	beef	na	x	na	na	RNAi	na	na	usa
Busch et al. (2021)	wheat, humans, milk, beef, pork	na	x	na	x	na	na	na	Canada, Austria, USA, Germany, Italy
Caputo et al. (2020)	pork, tomato, spinach	x	x	x	x	na	x	x	USA
Colson and Huffman (2011)	vegetables	x	na	x	na	intragenic	x	na	USA
Colson et al. (2011)	tomato, broccoli, potato	x	na	x	na	intragenic	x	na	USA
De Marchi et al. (2020a)	apples	x	x	na	x	na	x	na	Italy
De Marchi et al. (2020b)	apples	x	x	na	na	cisgenic	x	na	Italy
De Marchi et al. (2019)	apples	x	na	na	na	cisgenic	x	na	Italy
De Steur et al. (2016)	tomato, broccoli, potato, vegetables	x	x	x	na	intragenic	x	na	USA, China, France, NZ,
Delwaide et al. (2015)	rice	x	x	x	na	cisgenic	x	0	EU countries: Belgium, France, The Netherlands, Spain, The UK.
Edenbrandt (2018)	rye bread	x	na	x	na	cisgenic	x	x	Denmark
Edenbrandt et al. (2018a)	rye bread	x	na	x	na	cisgenic	x	x	Denmark
Edenbrandt et al. (2018b)	grapes	x	na	x	na	cisgenic	x	na	USA
EFSA (2010)	food, drink	na	x	x	na	na	x	na	EU-27
EFSA (2019)	food, drink	na	x	x	x	na	x	na	EU-27
Farid et al. (2020)	food, crops	x	x	na	x	na	na	na	Japan
Ferrari et al. (2020)	food	na	x	x	x	na	na	na	Belgium, Netherlands
Gaskell et al. (2011)	food	na	x	x	na	cisgenic	x	na	EU-27
Gatica-Arias, et al. (2019)	food, crops, rice, beans	na	x	na	x	na	na	na	Costa Rica
Kato-Nitta et al. (2021)	tomato, pork	na	x	x	x	na	x	na	Japan
Kato-Nitta et al. (2019)	crops	na	x	x	x	na	x	na	Japan
Kato-Nitta et al. (2021)	livestock, vegetables	na	x	0	x	na	x	0	Germany, Japan, US
Kilders and Caputo (2021)	milk	x	na	na	x	na	x	na	USA
Kronberger et al. (2014)	animals, human, plants, apples	na	x	x	0	cisgenic	x	0	Austria, Japan, EU 27
Lusk and Rozan (2006)	vegetables	na	x	x	na	ingenic	na	0	France USA
Lusk et al. (2018)	food	x	x	x	x	cisgenic	x	na	USA
Marette et al. (2021a)	apples	x	na	x	x	na	x	na	France, USA
Marette et al. (2021b)	apples	x	na	x	x	na	x	na	France, USA
McFadden et al. (2021)	oranges	x	na	na	x	na	na	na	USA
Mielby et al. (2013)	crops	na	x	x	na	cisgenic	na	na	Denmark
Müller et al. (2020)	plants, animal, bacteria, humans	na	x	na	x	na	na	na	Switzerland
Muringai et al. (2020)	potato	x	x	x	x	na	x	na	Canada
Narh et al. (2019)	rice	na	x	x	x	RNAi	na	0	Australia, Belgium, Canada, France, USA
Nkott and Temple (2021)	rice	na	x	na	x	na	na	na	Madagascar
Norwegian Biotechnology Advisory Board (NBAB). 2020	fruits, vegetables, wheat, crops, beef, pork, salmon, potato	x	x	x	x	na	na	x	Norway
Ortega et al. (2021)	rice, pork	x	x	x	x	na	x	na	China
Paudel (2021)	apples, soy oil	x	x	x	x	na	x	na	USA
Pruitt et al. (2021)	potato	x	na	x	x	na	na	na	USA
Rousselière and Rousselière (2017)	apples	na	x	x	na	cisgenic	na	na	EU-27, Norway, Iceland, Turkey
Saleh et al. (2021)	potato	na	x	na	x	cisgenic	x	x	Switzerland
Schaart (2004)	strawberries	x	x	x	na	cisgenic	na	na	Norway, Denmark, UK
Schenk et al. (2011)	apples	na	x	x	na	cisgenic	x	na	Netherlands
Shew et al. (2016)	rice	x	x	x	na	cisgenic	x	na	India
Shew et al. (2017)	rice	x	x	x	na	RNAi	x	na	Australia, Belgium, Canada, France, USA
Shew et al. (2018)	rice	x	x	x	x	na	x	na	Australia, Belgium, Canada, France, USA
Son and Lim (2021)	soybean oil, cotton	x	na	x	x	na	na	na	South Korea
Tabei et al. (2020)	food generic	na	x	na	x	na	na	na	Japan
Tsiboe et al. (2017)	rice	x	na	x	na	cisgenic	x	na	Ghana
Uddin et al. (2021)	grapes	x	x	na	x	na	x	na	USA
Vasquez Arreaga (2020)	potato, apples, milk, salmon, papaya, sweet corn	na	x	x	x	na	na	x	Canada
Yang and Hobbs (2020a)	food	na	x	0	x	na	na	na	Canada
Yang and Hobbs (2020b)	apples	x	na	x	x	na	x	na	Canada
Yunes et al. (2019)	pork	na	x	na	x	na	na	na	Brazil
Yunes et al. (2021)	beef	na	x	na	x	na	na	na	Brazil

## Sheet: statistical summary
countries coverage in studies						European countries	USA/ Canada	LAC	Africa	Asia						Summary data on studies
Australia, Belgium, Canada, France, USA						x	x								59	59 studies from 2004 to september 2021
Australia, Belgium, Canada, France, USA						x	x								43	43 acceptance/Wt Eat
Australia, Belgium, Canada, France, USA						x	x								33	31 wtp but some multiple countries
Austria, Japan, EU 27						x				x					45	45 comparative (conventional, GMO, Npets) with 36 conventional, 38 GMO, 13 organic
Belgium, Netherlands						x										37 Genome editing
Brazil								x								24 npets (4 RNAi, 16 cisgenic generic, 3 intragenic, 1 ingenic)
Brazil								x								44 refereed journal articles among the 59 studies
Canada						x
Canada						x
Canada						x										number of studies	period
Canada						x										3	up to 2010
Canada						x										5	2011-2013
Canada, Austria, USA, Germany, Italy						x	x									4	2014-2016
China										x						29	2017-2019
Costa Rica								x								18	2020-current
Costa Rica								x								59	total 2005-2021
Denmark						x
Denmark						x
Denmark						x										GMO	GE	other NPETs	Conventional Hybrids	organic
eu						x										38	37	24	34	12
eu						x											rnai	4
eu						x											cisgenic	16
EU countries plus Norway, Iceland, Turkey						x											intragenic	3
EU countries: Belgium, France, The Netherlands, Spain and The UK.						x											ingenic	1
France						x
France USA						x	x
France, USA						x	x
France, USA						x	x
Germany, Japan, USA						x	x			x
Ghana									x
India										x
Italy						x
Italy						x
Italy						x
Japan										x
Japan										x
Japan										x
Japan										x
japan										x
Lithuania						x
Madagascar									x
Netherlands						x
Norway						x
Norway, Denmark, UK						x
South Korea										x
US (Harrisburg Pennsylvania, Des Moines, IA)							x
US (Harrisburg Pennsylvania, Des Moines, IA)							x
US, China, France, NZ, for GMO, only US for intragenic						x	x			x
US, south region							x
usa							x
usa							x
USA							x
USA							x
USA							x
USA							x
USA							x
USA							x
USA							x
USA							x
						32	22	4	2	11
						European countries	USA/ Canada	LAC	Africa	Asia
